# Supplementary material for: Impact of Facultative Bacteria on the Metabolic Function of an Obligate Insect-Bacterial Symbiosis
Source: PubMed Central journal article supplement (PMC7360925; doi:10.1128/mbio.00402-20), 2020-07-14
Supplement: mBio.00402-20-sf001.pdf [file mBio.00402-20-sf001.pdf]

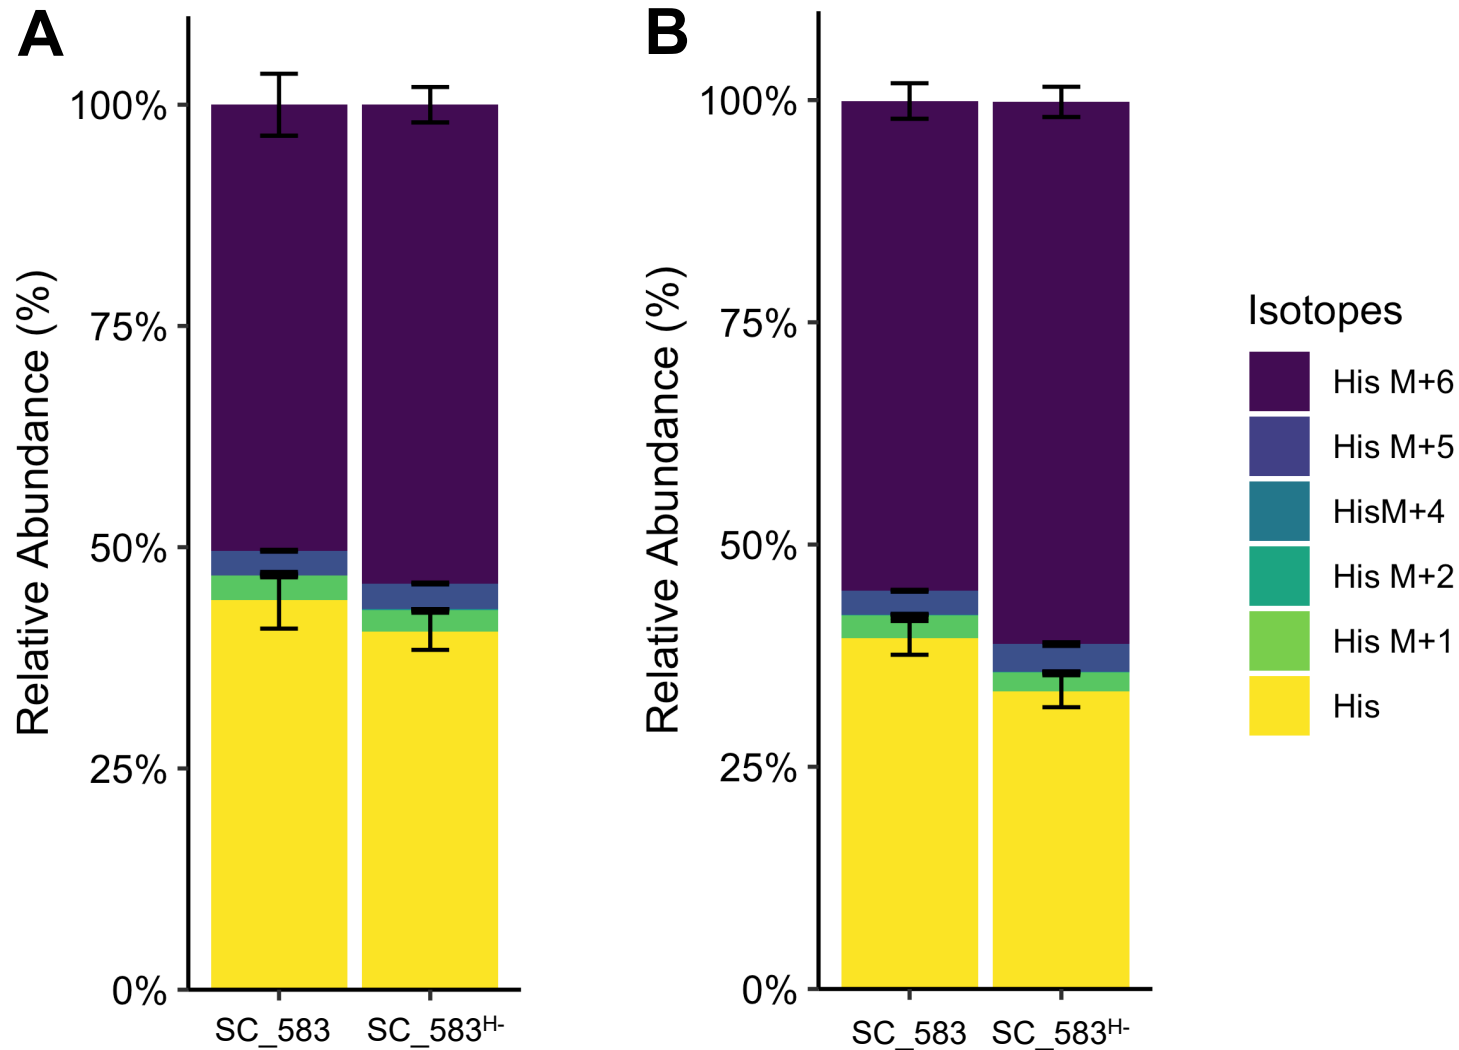

**FIG S1.** Relative proportions of histidine isotopes. **A** Hydrolyzed protein pools. **B** Soluble pools of histidine. Extracted from 7-day-old line 583 (bearing-*Hamiltonella*) and 583<sup>H-</sup> (*Hamiltonella*-free) larvae reared on diets containing <sup>13</sup>C<sub>6</sub>-histidine from day-2 to day-7 of larval development. Error bars show standard deviation of three biological replicates per treatment and timepoint.
